# Supplementary material
Source: MDPI journal article supplement (https://www.mdpi.com/2073-4441/13/4/568)
Supplement: s1 [file s1]

## Supplementary Materials

The principal data sources used for this analysis are the Multiple Indicator Cluster Survey (MICS) (<http://mics.unicef.org>), and Performance Monitoring for Action (PMA) (<https://www.pmadata.org>). Permission was granted to access and analyse the MICS 2016–2017 and PMA 2018 datasets for the purposes of this work in early 2020. We also make reference to summary results reported separately by the statistical authorities. Contextual data is sourced from the UNICEF/WHO Joint Monitoring Programme, available at <https://washdata.org/>.

### Section A. Data for Lagos State, Nigeria

**Table S1.** Main source of drinking water in Lagos State.

|                                                                           | MICS 2016–2017 (%)                | PMA 2018 (%)                      |
|---------------------------------------------------------------------------|-----------------------------------|-----------------------------------|
| Total Sample Size (households)                                            | 1681                              | 6486                              |
| Mode of Delivery                                                          | Main Source of Drinking Water (%) | Main Source of Drinking Water (%) |
| Sachet (pure) water                                                       | 57.3                              | 58.9                              |
| Bottled water                                                             | 5.8                               | 4.3                               |
| Tube well, Borehole                                                       | 26.0                              | 15.6                              |
| Protected well                                                            | 2.0                               | 0.4                               |
| Unprotected well                                                          | 1.4                               | 0.1                               |
| Public tap / standpipe                                                    | 1.8                               | 8.6                               |
| Piped into dwelling                                                       | 1.7                               | 6.6                               |
| Piped into compound, yard or plot                                         | 1.3                               | 4.0                               |
| Piped to neighbour                                                        | 1.7                               | n/a                               |
| Tanker-truck                                                              | 0.4                               | 1.3                               |
| Rainwater collection                                                      | 0.2                               | -                                 |
| Cart with small tank / drum                                               | 0.2                               | 0.2                               |
| Surface water (river, stream, dam, lake, pond, canal, irrigation channel) | 0.1                               | -                                 |
| Protected spring                                                          | n/a                               | 0.1                               |
| Other                                                                     | 0.1                               | n/a                               |

Source: adapted from MICS 2016–2017 and PMA 2018 surveys.

**Table S2.** Secondary drinking water source where packaged water reported as main source used for drinking water in Lagos State.

|                                   | MICS 2016–2017  | PMA 2018        |
|-----------------------------------|-----------------|-----------------|
| No of respondents                 | 1061            | 4057            |
| Mode of Delivery                  | Respondents (%) | Respondents (%) |
| Tube well, Borehole               | 57.7            | 31.1            |
| Protected well                    | 9.8             | 6.6             |
| Unprotected well                  | 3.9             | 2.1             |
| Piped into dwelling               | 6.5             | 23.2            |
| Public tap / standpipe            | 7.1             | 21.2            |
| Piped into compound, yard or plot | 6.1             | 11.0            |
| Piped to neighbour                | 3.8             | n/a             |
| Cart with small tank / drum       | 2.6             | 1.2             |
| Tanker-truck                      | 2.1             | 3.5             |
| Other                             | 0.5             | n/a             |

Source: adapted from MICS 2016–2017 and PMA 2018 surveys.

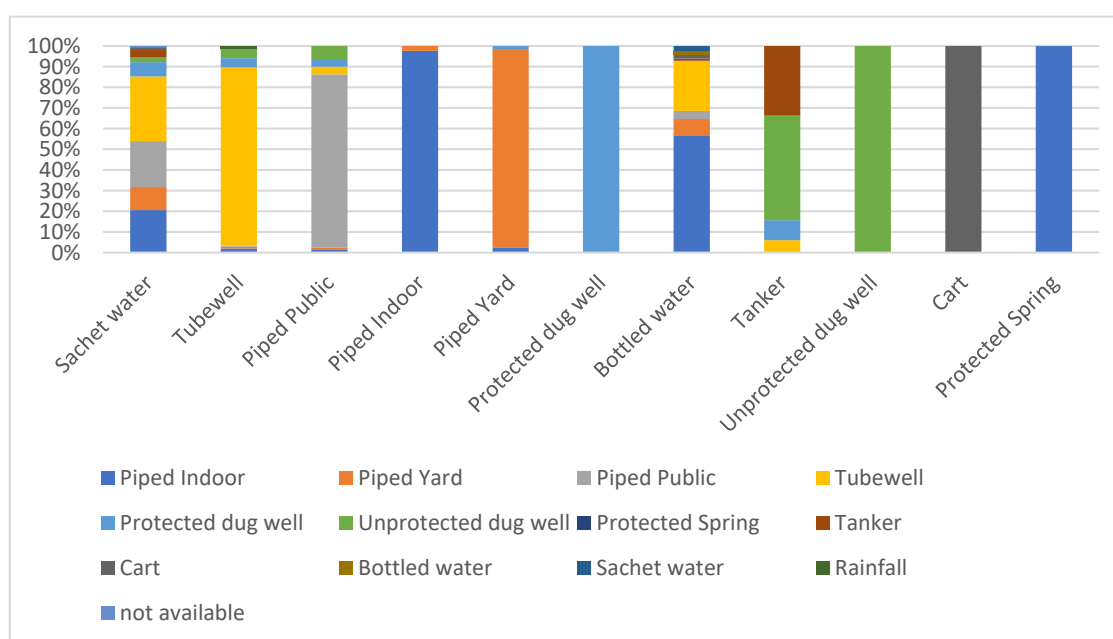

**Figure S1.** Source of water for other domestic uses according to main drinking water source (Lagos State, % of respondents). Source: adapted from MICS 2016–2017.

**Table S3.** Analysis of drinking water sources according to urban wealth quintiles.

|                                   | Proportion of Responses (%) |        |        |        |         |         |
|-----------------------------------|-----------------------------|--------|--------|--------|---------|---------|
| Urban Wealth Index Quintile       | Poorest                     | Second | Middle | Fourth | Richest | Average |
| Main Source of Drinking Water     |                             |        |        |        |         |         |
| Piped into dwelling               | 0.0                         | 1.1    | 0.0    | 0.4    | 3.2     | 1.8     |
| Piped into compound, yard or plot | 0.0                         | 1.1    | 1.6    | 1.8    | 1.1     | 1.4     |
| Piped to neighbour                | 0.0                         | 5.3    | 3.3    | 1.3    | 0.9     | 1.7     |
| Public tap / standpipe            | 0.0                         | 9.5    | 4.1    | 2.2    | 0.1     | 1.9     |
| Tube well, Borehole               | 71.4                        | 34.7   | 27.0   | 31.5   | 21.2    | 26.0    |
| Protected well                    | 0.0                         | 4.2    | 0.8    | 1.1    | 1.1     | 1.3     |
| Unprotected well                  | 0.0                         | 0.0    | 0.0    | 0.2    | 0.0     | 0.1     |
| Rainwater collection              | 0.0                         | 1.1    | 0.0    | 0.0    | 0.0     | 0.1     |
| Tanker-truck                      | 0.0                         | 0.0    | 0.4    | 0.9    | 0.3     | 0.4     |
| Cart with small tank / drum       | 0.0                         | 0.0    | 0.8    | 0.2    | 0.0     | 0.2     |
| Bottled water                     | 0.0                         | 0.0    | 0.4    | 1.3    | 11.2    | 6.0     |
| Sachet (pure) water               | 28.6                        | 43.2   | 61.1   | 58.9   | 60.7    | 59.0    |
| Other specify                     | 0.0                         | 0.0    | 0.4    | 0.0    | 0.1     | 0.1     |
| Respondents (No.)                 | 7                           | 95     | 244    | 445    | 783     | 1574    |

Source: Authors' calculation from MICS2016–2017.

**Table S4.** Location of water supply by Educational Attainment of Respondent (% respondents).

| Location of Water Supply source | Educational Attainment |         |                                       |        |            |         | TOTAL |
|---------------------------------|------------------------|---------|---------------------------------------|--------|------------|---------|-------|
|                                 | None                   | Primary | Secondary/Sec<br>ondary-<br>technical | Higher | Non-formal | Missing |       |
| In own dwelling                 | 17.3                   | 12.8    | 15.1                                  | 33.1   | 33.3       | 0.0     | 20.4  |
| In own yard / plot              | 19.8                   | 15.2    | 23.7                                  | 26.9   | 25.0       | 0.0     | 23.1  |
| Elsewhere                       | 63.0                   | 71.6    | 61.0                                  | 40.0   | 41.7       | 100.0   | 56.3  |

|         |       |       |       |       |       |       |       |
|---------|-------|-------|-------|-------|-------|-------|-------|
| Missing | 0.0   | 0.5   | 0.1   | 0.0   | 0.0   | 0.0   | 0.1   |
| Total   | 100.0 | 100.0 | 100.0 | 100.0 | 100.0 | 100.0 | 100.0 |

Source: authors' calculations based on MICS 2016–2017. n=1428.

**Table S5.** Location of water supply by number of rooms used for sleeping (% respondents).

| Location of the Water Source | Number of Rooms Used for Sleeping |       |       |       | Total |
|------------------------------|-----------------------------------|-------|-------|-------|-------|
|                              | 1                                 | 2     | 3     | >3    |       |
| In own dwelling              | 14.5                              | 28.0  | 51.8  | 48.1  | 20.4  |
| In own yard / plot           | 23.0                              | 25.6  | 15.7  | 18.5  | 23.1  |
| Elsewhere                    | 62.4                              | 46.1  | 32.5  | 33.3  | 56.3  |
| Missing                      | 0.1                               | 0.3   | 0.0   | 0.0   | 0.1   |
| Total                        | 100.0                             | 100.0 | 100.0 | 100.0 | 100.0 |

Source: authors' calculations based on MICS 2016–2017. n=1428.

**Table S6.** Location of water supply by tenure (% respondents).

| Location of the Water Source | Owned | Rent | Other (not Owned or Rented) | Total |
|------------------------------|-------|------|-----------------------------|-------|
| In own dwelling              | 30.6  | 16.8 | 31.5                        | 20.4  |
| In own yard / plot           | 20.5  | 23.5 | 25.2                        | 23.1  |
| Elsewhere                    | 48.8  | 59.5 | 43.2                        | 56.3  |
| Missing                      | 0.0   | 0.2  | 0.0                         | 0.1   |
| Total                        | 100   | 100  | 100                         | 100   |

Source: authors' calculations based on MICS 2016–2017. n=1428.

## Section B. Data for Nigeria

**Table S7.** Water Use Surveys for Nigeria, Collated by JMP.

|    | <b>Code</b> | <b>Survey Name</b>                                                        | <b>Year</b> | <b>Comments</b>         |
|----|-------------|---------------------------------------------------------------------------|-------------|-------------------------|
| 1  | DHS90       | Demographic and Health Survey                                             | 1990        |                         |
| 2  | MICS95      | Multiple Indicator Cluster Survey                                         | 1995        | No urban disaggregation |
| 3  | CEN96       | Census                                                                    | 1996        |                         |
| 4  | MICS99      | Multiple Indicator Cluster Survey                                         | 1999        |                         |
| 5  | DHS99       | Demographic and Health Survey                                             | 1999        |                         |
| 6  | CLS00       | Child Labour Survey                                                       | 2000        |                         |
| 7  | CWQ02       | Core Welfare Indicator Survey 2002 conducted in six States only           | 2002        | Not nationwide          |
| 8  | DHS03       | Demographic and Health Survey                                             | 2003        |                         |
| 9  | NLSS04      | Nigerian Living Standards Survey                                          | 2004        |                         |
| 10 | RADWQ05     | Rapid Assessment of Drinking Water Quality                                | 2005        | Water quality only      |
| 11 | CWQ06       | Core Welfare Indicator Questionnaire                                      | 2006        |                         |
| 12 | GHS06       | General Household Survey                                                  | 2006        |                         |
| 13 | MICS07      | Multiple Indicator Cluster Survey                                         | 2007        |                         |
| 14 | BLS08       | Nigeria Water Supply and Sanitation Baseline Survey                       | 2008        |                         |
| 15 | DHS08       | Demographic and Health Survey                                             | 2008        |                         |
| 16 | LSS09       | Nigeria Living Standards Survey                                           | 2009        |                         |
| 17 | MIS10       | Malaria Indicators Survey (MIS)                                           | 2010        |                         |
| 18 | CEN10       | Census                                                                    | 2010        |                         |
| 19 | IBNET11     | The International Benchmarking Network for Water and Sanitation Utilities | 2011        | Availability only       |
| 20 | LSMS11      | Living Standards Measurement Study (LSMS)                                 | 2011        |                         |
| 21 | MICS11      | Multiple Indicator Cluster Survey                                         | 2011        |                         |
| 22 | IBNET12     | The International Benchmarking Network for Water and Sanitation Utilities | 2012        | Availability only       |
| 23 | IBNET13     | The International Benchmarking Network for Water and Sanitation Utilities | 2013        | Availability only       |
| 24 | GHS13       | General Household Survey                                                  | 2013        |                         |
| 25 | DHS13       | Demographic and Health Survey                                             | 2013        |                         |
| 26 | IBNET14     | The International Benchmarking Network for Water and Sanitation Utilities | 2014        | Availability only       |
| 27 | NNHS14      | Nutrition and Health Survey                                               | 2014        | No urban disaggregation |
| 28 | MIS15       | Malaria Indicators Survey (MIS)                                           | 2015        |                         |
| 29 | GHS16       | General Household Survey                                                  | 2016        |                         |
| 30 | PMA16       | Performance Monitoring and Accountability                                 | 2016        |                         |
| 31 | PMA17       | Performance Monitoring and Accountability                                 | 2017        |                         |
| 32 | MICS17      | Multiple Indicator Cluster Survey                                         | 2017        |                         |
| 33 | PMA18       | Performance Monitoring and Accountability                                 | 2018        |                         |
| 34 | NORM18      | National Outcome Routine Mapping                                          | 2018        |                         |

**Table S8.** Location of main source of drinking water (Urban Nigeria).

|                             | Location of the Water Source |                    |           |         | Total % | Total No. |
|-----------------------------|------------------------------|--------------------|-----------|---------|---------|-----------|
|                             | In own dwelling              | In own yard / plot | Elsewhere | Missing |         |           |
| Public tap / standpipe      | 5.8                          | 6.7                | 87.0      | 0.4     | 100.0   | 684       |
| Tube well, Borehole         | 12.3                         | 10.2               | 77.4      | 0.1     | 100.0   | 3905      |
| Protected well              | 29.1                         | 25.0               | 45.7      | 0.2     | 100.0   | 1262      |
| Unprotected well            | 37.0                         | 15.2               | 47.9      | 0.0     | 100.0   | 349       |
| Protected spring            | 15.4                         | 13.8               | 70.8      | 0.0     | 100.0   | 65        |
| Unprotected spring          | 15.4                         | 7.7                | 76.9      | 0.0     | 100.0   | 26        |
| Rainwater collection        | 57.2                         | 38.7               | 3.4       | 0.8     | 100.0   | 388       |
| Tanker-truck                | 7.2                          | 9.9                | 82.5      | 0.4     | 100.0   | 223       |
| Cart with small tank / drum | 6.6                          | 1.8                | 90.7      | 0.9     | 100.0   | 226       |
| Surface water               | 3.1                          | 7.8                | 89.1      | 0.0     | 100.0   | 321       |
| Bottled water               | 51.8                         | 18.4               | 29.8      | 0.0     | 100.0   | 141       |
| Sachet (pure) water         | 21.3                         | 23.3               | 54.9      | 0.5     | 100.0   | 2228      |
| Other specify               | 30.0                         | 6.0                | 62.0      | 2.0     | 100.0   | 50        |
| All sources                 | 18.8                         | 15.9               | 65.0      | 0.3     | 100.0   | 9868      |
| Total                       | 1857                         | 1572               | 6411      | 28      | 9868    |           |

Source: Authors' analysis of MICS 2016–2017.

**Table S9.** Location of main source of drinking water supplies (urban: Nigeria).

| Location of the water source | Public tap / standpipe | Tubewell, Borehole | Protected well | Unprotected well | Protected spring | Unprotected spring | Rainwater collection | Tanker-truck | Cart with small tank / drum | Surface water (river, stream, dam, lake, pond, canal, irrigation channel) | Bottled water | Sachet (pure) water | Other specify | Total |
|------------------------------|------------------------|--------------------|----------------|------------------|------------------|--------------------|----------------------|--------------|-----------------------------|---------------------------------------------------------------------------|---------------|---------------------|---------------|-------|
| In own dwelling              | 40                     | 481                | 367            | 129              | 10               | 4                  | 222                  | 16           | 15                          | 10                                                                        | 73            | 475                 | 15            | 1857  |
| In own yard / plot           | 46                     | 397                | 316            | 53               | 9                | 2                  | 150                  | 22           | 4                           | 25                                                                        | 26            | 519                 | 3             | 1572  |
| Elsewhere                    | 595                    | 3022               | 577            | 167              | 46               | 20                 | 13                   | 184          | 205                         | 286                                                                       | 42            | 1223                | 31            | 6411  |
| Missing                      | 3                      | 5                  | 2              | 0                | 0                | 0                  | 3                    | 1            | 2                           | 0                                                                         | 0             | 11                  | 1             | 28    |
| Total                        | 684                    | 3905               | 1262           | 349              | 65               | 26                 | 388                  | 223          | 226                         | 321                                                                       | 141           | 2228                | 50            | 9868  |

Source: MICS 2016–2017.

## Section C. Data for Sub-Saharan Africa

**Table S10.** Sources of Data for SSA Country-level analysis.

| <b>Country</b>                   | <b>Source 1</b> | <b>Source 2</b> |
|----------------------------------|-----------------|-----------------|
| Angola                           | CEN 14          | IIMS 16         |
| Benin                            | CEN13           | MICS14          |
| Burkina Faso                     | PMA16           | PMA17           |
| Burundi                          | MIS12           | DHS17           |
| Botswana                         | MTHS16          | BDS17           |
| Central African Republic         | MICS10          | na              |
| Democratic Republic of the Congo | ENQ12           | DHS14           |
| Comoros                          | DHS-MICS12      | na              |
| Cabo Verde                       | IMC16           | IMC17           |
| Cote d'Ivoire                    | MICS16          | PMA17           |
| Cameroon                         | DHS11           | MICS14          |
| Congo                            | DHS12           | MICS15          |
| Djibouti                         | EDSESIC 15      | EDAM 17         |
| Eritrea                          | PHS10           | na              |
| Ethiopia                         | PMA16           | PMA17           |
| Gabon                            | DHS12           | CEN13           |
| Gambia                           | DHS13           | CEN13           |
| Ghana                            | MHS17           | GMS17           |
| Guinea                           | CEN14           | MICS16          |
| Guinea-Bissau                    | MICS14          | na              |
| Equatorial Guinea                | EDSGE11         | na              |
| Kenya                            | PMA16           | PMA 17          |
| Lesotho                          | CMS14           | CMS15           |
| Liberia                          | HIES15          | MIS16           |
| Madagascar                       | LTM15           | MIS16           |
| Mali                             | EMOP17          | EMOP18          |
| Mauritania                       | EPCV14          | MICS15          |
| Mauritius                        | CEN11           | na              |
| Malawi                           | IHS17           | MIS17           |
| Mozambique                       | IOF 15          | AIS15           |
| Namibia                          | NIDS 16         | HIES 16         |
| Niger                            | PMA16           | PMA17           |
| Nigeria                          | PMA18           | NORM18          |
| Chad                             | EDS-MICS15      | na              |
| Rwanda                           | MIS17           | EICV17          |
| Senegal                          | DHS16           | DHS17           |
| Sierra Leone                     | MIS16           | MICS17          |
| Somalia                          | HFS17           | na              |
| South Sudan                      | HFSU15          | HFS17           |
| Sao Tome and Principe            | CEN12           | MICS14          |
| Eswatini                         | ICEN12          | MICS14          |
| Seychelles (national)            | HSS12           | HBS13           |
| South Africa                     | GHS17           | NIDS 17         |
| Togo                             | QUIBB15         | MIS17           |
| Tanzania                         | DHS16           | MIS17           |
| Uganda                           | PMA16           | PMA17           |

|          |        |        |
|----------|--------|--------|
| Zambia   | DHS14  | LCMS15 |
| Zimbabwe | MICS14 | DHS15  |

**Table S11.** Variations between surveys of over 10 percentage points.

| Country       | Source         | Variation (in percentage points) | Comments                                                                                                                                       |
|---------------|----------------|----------------------------------|------------------------------------------------------------------------------------------------------------------------------------------------|
| Angola        | Tapwater       | 23.4                             | 2014 data is from the census and a survey                                                                                                      |
| Ghana         | Tapwater       | 10.4                             | The difference is mainly caused by major differences in estimates in the use of public taps/standpipe between surveys                          |
| Mauritania    | Tapwater       | 10.4                             | Two different surveys, one year apart                                                                                                          |
| Malawi        | Tapwater       | 13.8                             | Two different surveys in the same year                                                                                                         |
| Togo          | Tapwater       | 10.7                             | Two different surveys, two years apart                                                                                                         |
| Côte d'Ivoire | Groundwater    | 10.6                             | Significant differences between use of traditional and protected wells between the two surveys                                                 |
| Liberia       | Groundwater    | 25.1                             | Significant difference in reported use of boreholes between the two surveys (one year apart)                                                   |
| Niger         | Groundwater    | 32.1                             | PMA Survey, one year apart. Significant differences in reporting of protected well and traditional wells between the surveys.                  |
| Nigeria       | Groundwater    | 29.7                             | Different surveys, same year. Significant differences in reporting of use of borehole protected well and traditional wells between the surveys |
| Liberia       | Packaged water | 18.3                             | Different surveys, one year apart. Sachet water does not seem to have been measured in one survey.                                             |

Source: Calculated from JMP Country Data (<https://washtdata.org>).

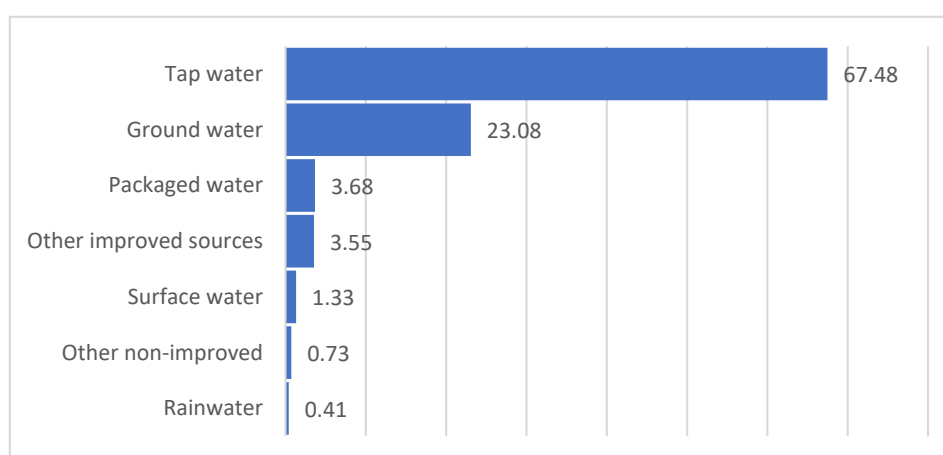

**Figure S2.** Main sources of urban drinking water supplies in SSA (% urban population).

Source: adapted from JMP data sources (Table S11). n=45 countries.

**Table S12.** Percentage of the urban population relying on groundwater in 44 countries with available survey data.

| Country                          | Percentage of the Urban Population |
|----------------------------------|------------------------------------|
| South Sudan                      | 62.7                               |
| Sierra Leone                     | 55.1                               |
| Central African Republic         | 49.1                               |
| Chad                             | 48                                 |
| Liberia                          | 46.1                               |
| Nigeria                          | 45.3                               |
| Equatorial Guinea                | 44.7                               |
| Togo                             | 44.5                               |
| Uganda                           | 42                                 |
| Guinea-Bissau                    | 41                                 |
| Benin                            | 39.7                               |
| Mali                             | 34.7                               |
| Angola                           | 34.5                               |
| Democratic Republic of the Congo | 33.5                               |
| Guinea                           | 33.1                               |
| Cameroon                         | 32.8                               |
| Zimbabwe                         | 30.7                               |
| Côte d'Ivoire                    | 28.7                               |
| Zambia                           | 24.8                               |
| Tanzania                         | 23.7                               |
| Madagascar                       | 23.2                               |
| Kenya                            | 22.3                               |
| Mozambique                       | 21.4                               |
| Congo                            | 20.7                               |
| Burkina Faso                     | 18.6                               |
| Niger                            | 17.9                               |
| Rwanda                           | 17.2                               |
| Malawi                           | 16.3                               |
| Gambia                           | 14.4                               |
| Ghana                            | 11.3                               |
| Somalia                          | 9.5                                |
| Lesotho                          | 8.2                                |
| Senegal                          | 8.2                                |
| Burundi                          | 7.5                                |
| Ethiopia                         | 6.2                                |
| Mauritania                       | 5.3                                |
| Comoros                          | 5.1                                |
| Eritrea                          | 3.4                                |
| Eswatini                         | 3.2                                |
| Gabon                            | 2.7                                |
| Djibouti                         | 0.6                                |
| Namibia                          | 0.6                                |
| South Africa                     | 0.5                                |
| Botswana                         | 0.2                                |

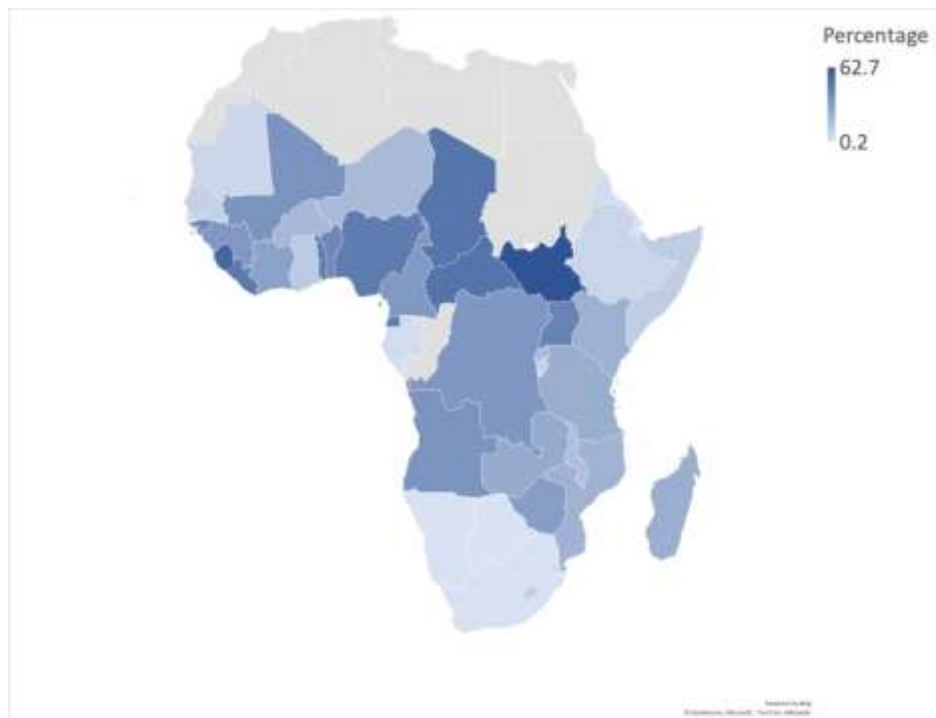

**Figure S3.** Percentage of the urban population using groundwater point sources as the main drinking water supply (Table S13).

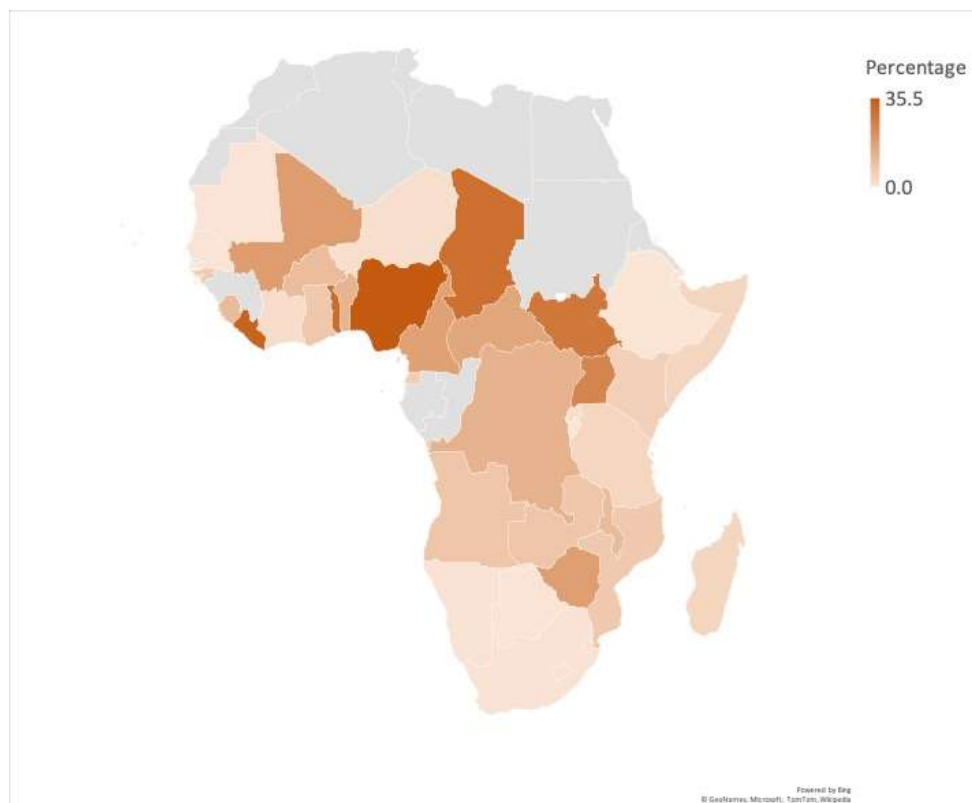

**Figure S4.** Percentage of the urban population with a borehole as their main drinking water supply (Table S14).

**Table S13.** Percentage of the urban population relying on boreholes/tubewells in 40 countries with available survey data.

| <b>Country</b>                   | <b>Percentage of the Urban Population</b> |
|----------------------------------|-------------------------------------------|
| Nigeria                          | 35.5                                      |
| Liberia                          | 33.0                                      |
| Togo                             | 30.7                                      |
| Chad                             | 30.0                                      |
| South Sudan                      | 27.7                                      |
| Uganda                           | 24.4                                      |
| Mali                             | 18.4                                      |
| Zimbabwe                         | 17.7                                      |
| Cameroon                         | 17.4                                      |
| Central African Republic         | 15.8                                      |
| Congo                            | 12.9                                      |
| Benin                            | 12.4                                      |
| Malawi                           | 10.6                                      |
| Sierra Leone                     | 10.4                                      |
| Burkina Faso                     | 10.2                                      |
| Zambia                           | 8.0                                       |
| Angola                           | 7.9                                       |
| Ghana                            | 7.5                                       |
| Mozambique                       | 7.0                                       |
| Guinea-Bissau                    | 6.6                                       |
| Equatorial Guinea                | 5.5                                       |
| Kenya                            | 5.2                                       |
| Somalia                          | 3.9                                       |
| Madagascar                       | 3.7                                       |
| Tanzania                         | 3.6                                       |
| Democratic Republic of the Congo | 3.2                                       |
| Côte d'Ivoire                    | 2.0                                       |
| Rwanda                           | 1.7                                       |
| Niger                            | 1.6                                       |
| Eswatini                         | 0.9                                       |
| Lesotho                          | 0.8                                       |
| Comoros                          | 0.8                                       |
| South Africa                     | 0.5                                       |
| Namibia                          | 0.4                                       |
| Senegal                          | 0.2                                       |
| Mauritania                       | 0.2                                       |
| Botswana                         | 0.1                                       |
| Ethiopia                         | 0.1                                       |
| Djibouti                         | 0.1                                       |
| Burundi                          | 0.0                                       |

Source: adapted from JMP (2019).
